# Supplementary material for: Case Report: Zolpidem’s paradoxical restorative action: A case report of functional brain imaging
Source: Frontiers journal article supplement (doi:10.3389/fnins.2023.1127542), 2023-04-14
Supplement: Table_1.DOCX [file Table_1.DOCX]

Article Title : Zolpidem’s paradoxical restorative action : a case report of functional brain imaging

Jennifer Boisgontier*1,2; Kévin Beccaria3; Ana Saitovitch1,2; Thomas Blauwblomme3; Lelio Guida3; Ludovic Fillon1,2; Christelle Dufour4; Jacques Grill4; Hervé Lemaitre5; Stéphanie Puget6; Alice Vinçon-Leite1,2; Volodia Dangouloff-Ros1;Sarah Charpy1; Sandro Benichi3; Raphaël Levy1; Charles-Joris Roux1; David Grévent1; Marie Bourgeois3; Lila Saidoun4; Raphaël Gaillard7; Monica Zilbovicius8; Nathalie Boddaert1

*** Correspondence:**Corresponding Author
Jennifer Boisgontier*, Necker-Enfants Malades hospital, AP-HP, Pediatric Radiology Department, University of Paris, Paris, France

E-mail address: [boisgontier.jennifer1414@gmail.com](mailto:boisgontier.jennifer1414@gmail.com)

**Supplementary Table 1**

| ***Pairs of ROIS*** | ***Preop FC values*** | ***Postop FC values*** | ***Post- zolpidem FC values*** | ***Control group FC values: mean [SD]*** | ***Postop < preop FC values*** | ***Postop > preop FC values*** | ***Post-zolpidem > postop FC value*** | ***Post-zolpidem < postop FC value*** | ***Post-zolpidem > preop FC values*** | ***Preop < control group*** | ***Post-zolpidem < control group*** |
| --- | --- | --- | --- | --- | --- | --- | --- | --- | --- | --- | --- |
| ***Left hemisphere (t-value ; p-value)*** | | | | | | | | | | | |
| ***t(VL) – right DN*** | 0.38 | 0.04 | 0.14 | 0.39[0.18] | 2.49 0.049* | - | 2.38 0.048* | - | -0.82 0.43 | 0.77 0.46 | 1.52 0.17 |
| ***SMA – t(VA)*** | 0.63 | 0.05 | 0.37 | 0.34[0.15] | 2.60 0.040* | - | 2.48 0.047* | - | 0.092 0.92 | -1.12 0.30 | -1.03 0.33 |
| ***SMA – Broca’s area*** | 0.77 | 0.04 | 0.62 | 0.58[0.17] | 2.86 0.028* | - | 2.58 0.041* | - | 0.17 0.86 | -0.13 0.86 | 0.92 0.39 |
| ***Broca’s area – t(VA)*** | 0.86 | 0.004 | 0.54 | 0.40[0.12] | 3.65 0.014* | - | 2.49 0.049* | - | 0.87 0.41 | 1.16 0.28 | -0.47 0.64 |
| ***Broca’s area – striatum*** | 0.26 | 0.05 | 0.59 | 0.81[0.15] | 2.56 0.042* | - | 2.36 0.048* | - | 1.63 0.15 | 1.70 0.14 | 0.90 0.31 |
| ***Striatum – GPi*** | 0.36 | 0.95 | 0.42 | 0.65[0.17] | - | -2.94 0.02* | - | -2.45 0.047* | 0.17 0.86 | 1.82 0.12 | 1.95 0.10 |
| ***GPi – t(VA)*** | 0.46 | 0.98 | 0.50 | 0.63[0.14] | - | -3.14 0.02* | - | -2.60 0.040 | -0.14 0.88 | 1.52 0.17 | 1.84 0.11 |
| ***Right hemisphere (t-value ; p-value)*** | | | | | | | | | | | |
| ***t(VL) – left DN*** | *0.26* | *0.19* | *0.20* | *0.39[0.24]* | *0.22 0.83* | *-* | *-0.19 0.85* | *-* | *0.20 0.86* | 0.38 0.94 | 1.11 0.30 |
| ***SMA – t(VA)*** | *0.50* | *0.10* | *0.23* | *0.31[0.13]* | *1.52 0.17* | *-* | *0.58 0.57* | *-* | *-1.36 0.22* | -0.80 0.45 | 0.07 0.94 |
| ***SMA – IFGtr-op*** | *0.58* | *0.38* | *0.62* | *0.53[0.17]* | *1.28 0.24* | *-* | *1.51 0.18* | *-* | *-0.15 0.88* | 0.053 0.95 | -0.053 0.94 |
| ***IFGtr-op– t(VA)*** | *0.62* | *0.20* | *0.56* | *0.34[0.10]* | *1.54 0.17* | *-* | *1.86 0.11* | *-* | *-0.26 0.80* | 0.50 0.63 | 0.50 0.70 |
| ***IFGtr-op – striatum*** | *0.84* | *0.46* | *0.50* | *0.76[0.22]* | *1.27 0.24* | *-* | *0.12 0.90* | *-* | *1.12 0.30* | 0.37 0.72 | 1.22 0.26 |
| ***Striatum – GPi*** | *0.68* | *0.55* | *0.48* | *0.65[0.11]* | *0.84 0.43* | *-* | *-0.83 0..44* | *-* | *2.10 0.10* | -0.42 0.68 | 0.73 0.48 |
| ***GPi – t(VA)*** | *0.30* | *0.59* | *0.36* | *0.61[0.23]* | *-1.69 0.14* | *-* | *-1.26 0.43* | *-* | *-0.29 0.43* | 1.86 0.10 | 1.72 0.14 |

Supplementary Table 1:

Title: Mean of correlation coefficient for each pair of bilateral ROIs and results of statistical comparison.

Caption: Coefficient correlation values for control group are expressed as the mean and standard deviation [SD].

***** P < 0.05 corrected for multiple comparisons using false discovery rate (FDR) Benjamini Hochberg correction.
